# Supplementary material for: The importance of the shape of the protein–water interface of a kinesin motor domain for dynamics of the surface atoms of the protein
Source: Royal Society of Chemistry journal article supplement (doi:10.1039/c2cp40105c), 2012-01-01
Supplement: c2cp40105c.pdf [file c2cp40105c.pdf]

## **SUPPORTING INFORMATION**

### **The importance of shape of protein-water interface of kinesin motor domain for dynamics of the surface atoms of the protein**

**Anna Kuffel and Jan Zielkiewicz**

*Gdańsk University of Technology, Department of Chemistry*

*Narutowicza 11/12, 80–952 Gdańsk, Poland.*

## I. DESCRIPTION OF COMPUTATIONAL METHODS

**Definition of solvation layer.** On the kinesin surface, 30 regions were selected and hydration shell of each one of them was separately analyzed. Generally, the main criterion to define a separate region was its secondary structure. These amino acids, which were buried inside the protein, were not taken into account. List of all of the regions along with numbers of amino acids belonging to them is presented in Table S1. Figure S1 illustrates the way, in which solvation shells have been defined.

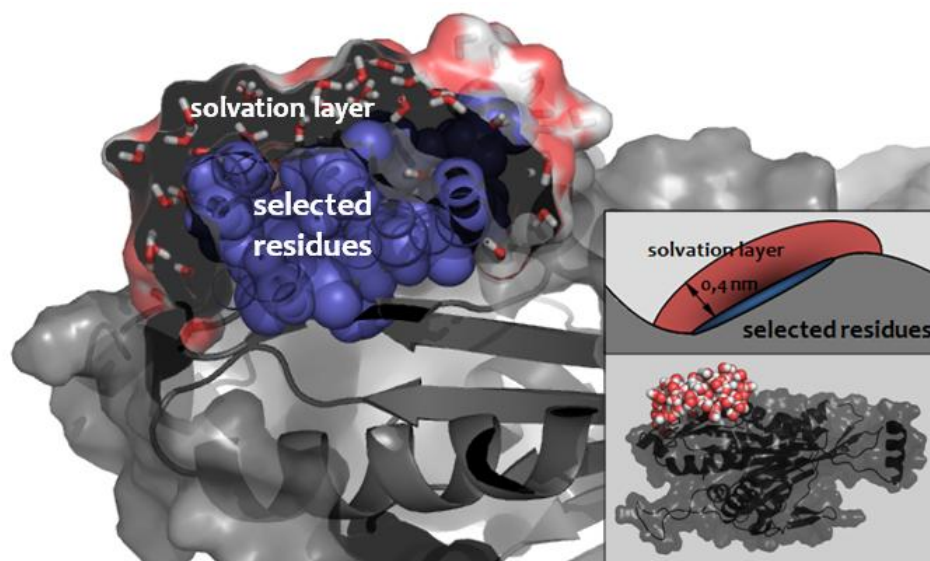

**Figure S1.** An illustration of solvation shell next to one selected region on kinesin surface. Water molecules, whose centers of mass are within the distance  $R=0.4$  nm from selected protein residues are taken into account. On the right lower corner, a whole kinesin motor domain and water molecules surrounding one selected region are shown. Image was created using PyMOL.<sup>1</sup>

It should be noted that the regions  $\alpha 7$  and L11 were omitted on Figures 5 and 6 in the main text. These regions protrude very substantially and can move to a high degree independently of the rest of the molecule. Therefore, we have decided to omit them in the discussion concerning protein dynamics. They are however included in all of the rest figures.

**Modification of water model.** We modified SPCE model of water following the conception described by Sorin *et al.*<sup>2</sup> According to this idea, both  $\epsilon$  and  $\sigma$  Lennard-Jones parameters have

been modified, keeping the density of water unchanged. The parameters, along with selected physical properties of modified models, are collected in the table below.

| Model | $\epsilon$<br>[kJ·mol <sup>-1</sup> ]<br>([kcal·mol <sup>-1</sup> ]) | $\sigma$<br>[nm] | Density, $\rho$<br>[g·cm <sup>-3</sup> ] | Translational<br>diffusion, $D_T$<br>[10 <sup>-9</sup> m <sup>2</sup> ·s <sup>-1</sup> ] | $n_{\text{HB}}$ |
|-------|----------------------------------------------------------------------|------------------|------------------------------------------|------------------------------------------------------------------------------------------|-----------------|
| mod10 | 0.41840<br>(0.10)                                                    | 0.32277          | 0.999                                    | 1.52                                                                                     | 3.48            |
| mod20 | 0.83680<br>(0.20)                                                    | 0.31431          | 0.998                                    | 3.71                                                                                     | 3.09            |
| mod25 | 1.04600<br>(0.25)                                                    | 0.31313          | 0.999                                    | 4.54                                                                                     | 2.87            |

**The hydrogen bond analysis.** During the analysis of the results of computer simulations, it is important to choose such definition of hydrogen bond that will be physically reasonable. This criterion is fulfilled by, for example, the most popular and commonly used, so called “geometric” definition. It resorts to results of neutron scattering data, which suggest the limitation of HB angles to the interval (0° ÷ 30°).<sup>3</sup> Another definition is the “cone” one, put forward by Wernet *et al.* (see reference 32 in the main text). This one is well founded on the results of X-ray scattering measurements. It should be noted here that the “cone” definition seems to be more physically reasonable than the geometric one – for illustration see Figure 5 in reference 4. This is why we applied it in our investigations.

According to this definition, the hydrogen bond between two water molecules is formed if the oxygen-oxygen distance fulfills the relation:

$$R_{OO} \leq -0.000044\beta_{OOH}^2 + 0.33[\text{nm}]$$

where  $\beta_{OOH}$  is the O-O-H angle (in degrees). We additionally demanded the total interaction energy between two hydrogen-bonded molecules to be negative – it is roughly equivalent to demanding the force acting between these molecules to be attractive. This total interaction energy was computed as the sum of both Lennard-Jones and electrostatic terms between two molecules, for which the relation above was fulfilled.

To describe the hydrogen bond network structure, we slightly modified Chau and Hardwick's<sup>5</sup> idea; the adopted procedure has been described in details in our previous paper (ref.30 in the main text). The main idea of this approach is the analysis of all angles,  $\theta$ , between the vectors linking the oxygen atom of the central water molecule with the oxygen atoms of all its partners which form the hydrogen bonds with this molecule (it should be noted here that the number of these partners, of course, is not fixed). Next, we build histogram describing the probability distribution of the angles. This histogram has been normalized, assuming a total area bounded by the graph to be equal to 100. By adopting this procedure to water molecules within solvation layer, probability distribution is obtained, which reflects overall (geometrical) structure of the hydrogen bond network within this space region.

**The Voronoi tessellation( $\eta$  and  $\gamma$  parameters).** Voronoi polyhedra were developed by Voronoi in 1908. Bernal and Finney<sup>6</sup> found them to be useful in describing the structure of liquids in the 1960s. Richards<sup>7</sup> applied this method to proteins. Since Procacci and Scateni<sup>8</sup>, who used this method to analyze the results of simulation of protein in water, the interest in it is recently increasing.<sup>9</sup> In our paper, we have slightly modified this procedure comparing with its most common use. Usually all water molecules are treated as points and represented by oxygen atoms (ref. 36 in the main text) or by centers of mass (ref. 33 and 34 in the main text). Herein, we treat a tagged water molecule as a point represented by its center of mass, whereas surrounding particles are treated as a set of individual atoms. This approach assures consistency of results of calculations if we adapt the tessellation procedure to water molecules in the neighborhood of the protein surface. In this case, instead of some atoms of water molecules, atoms of protein molecule are present in the vicinity. The asphericity factor,  $\eta$ , used in this work was introduced by Ruocco *et al.*(ref. 33 and 34 in the main text). This dimensionless parameter was designed as a rational measure of the cell shape and it is calculated from the relation:  $\eta=A^3/(36\pi V^2)$ , where  $A$  symbolizes the cell area, while  $V$  symbolizes its volume. This method has also been used for calculations of  $\gamma$  parameter (the volume of the first solvation shell,  $V_{solv}$ , and the surface area of contact of every selected patch with water,  $S_{solv}$ ).

**Velocity autocorrelation functions and diffusion coefficients.** Let  $\mathbf{v}_K(t)$  denote a vector of translational ( $K=T$ ) or rotational velocity ( $K=R$ ) of water molecule. The “short time” diffusion coefficients: translational ( $D_T$ ), and rotational ( $D_R$ ), were calculated from the appropriate velocity auto-correlation function using the well-known Green-Kubo relation:<sup>10</sup>

$$D_K = \frac{1}{3} \lim_{t \rightarrow \infty} \left( \int_0^t C_K(t) dt \right)$$

where  $C_K(t)$  symbolizes the translational (or angular) velocity auto-correlation function:

$$C_K(t) = \lim_{T \rightarrow \infty} \left( \frac{1}{T} \int_0^T \mathbf{v}_K(x) \mathbf{v}_K(x+t) dx \right) = \langle \mathbf{v}_K(x) \mathbf{v}_K(x+t) \rangle$$

Determination of autocorrelation function requires, of course, monitoring of the state of each molecule over the time; in this work we used 1.5 ps as a correlation time (it is assumed to be “infinity” in the equation above). During this period each molecule moves around, changing its position in space. The problem: how to ascribe particular molecules to the solvation shells, has been described in detail in our previous paper(ref. 37 in the main text). The adopted procedure allows us to determine diffusion coefficients within relatively thin solvation shell.

To make our results more reliable, many separate calculations have been performed and results in Table S2 represent obtained averages.

**The use of the  $s_{conf}$  parameter instead of the  $s_{ort}$  one.** The local ordering parameter has been defined previously (see ref. 30 in the main text) using the two-particle correlation function for water and there are two versions of it. The first one is called  $s_{ort}(R_c)$  and it is sensible to the mutual orientations of a central molecule and molecules surrounding it. The second one is called  $s_{conf}(R_c)$ ; it is a simplified form of the  $s_{ort}(R_c)$  parameter and its value is calculated assuming that surrounding molecules are represented by points. In the cited paper we have demonstrated that parameter  $s_{conf}(R_c)$  can be successfully used instead of  $s_{ort}(R_c)$ , which is more difficult to calculate. Now we want to answer the question, whether there still is an interdependence of both of these parameters for water near different regions of kinesin surface.

Because of difficulties in determination of the  $s_{ort}(R_c)$  quantity (for more details see our previous papers, references 30 and 31 in the main text), we confirm the relationship between  $s_{conf}(R_c)$  and  $s_{ort}(R_c)$  parameters only within the solvation layer of double thickness (equal to 0.8 nm); it is shown in Figure S2. We assume, however, that it is also true within the first solvation layer (0.4 nm thick). The validity of this assumption can be supported by the results presented on Figure S3, described below. Therefore, parameter  $s_{conf}(R_c)$  will be used as a measure of orientational effects of water molecules within solvation layers.

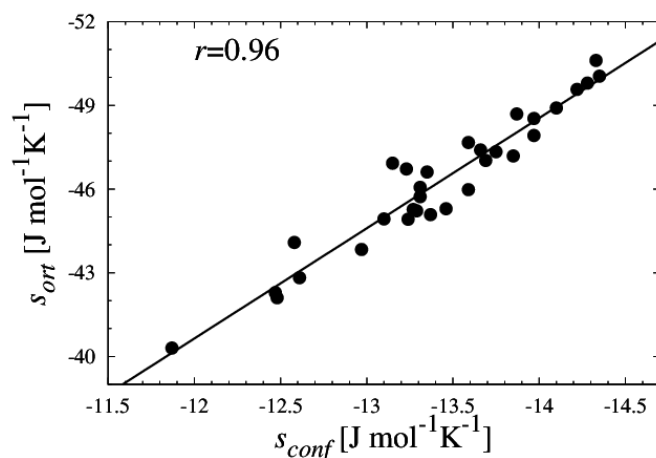

**Figure S2.** Correlation between the parameters  $s_{ort}$  (0.58) and  $s_{conf}$  (0.58), calculated around different patches on the kinesin surface and using double thickness of solvation layer. Straight line on this graph was plotted using the least-square fitting method. The value of correlation coefficient  $r$  is also included.

Previously<sup>11</sup> for a system consisting solely of water, a correlation has been found between a mean number of hydrogen bonds in water and the two-particle contribution to the entropy,  $s_{conf}^{(2)}$  (if water is the only constituent, we have  $s_{conf} = s_{conf}^{(2)}$ , what is a simple consequence of a definition of  $s_{conf}$  parameter). Therefore we can say that a mean number of hydrogen bonds formed by a water molecule reflects in a way the degree of structural ordering of water. However, the results discussed in that paper relate to the situation, when thermal motions are responsible for breaking of hydrogen bonds and for changing the values of  $s_{conf}^{(2)}$ . Because of that, this kind of correlation does not have to occur for water in solvation layer. Nevertheless, as can be seen on Figure S3, the values of  $s_{conf}$  parameter are undoubtedly correlated with the mean number of hydrogen bonds, in which a single molecule participate; note that Figure S3 demonstrates the existence of the correlation within solvation layer of both – single and double – thickness. However, in our opinion, in this case the degree of local corrugation of the surface is responsible for the observed correlation. It is discussed in the main text.

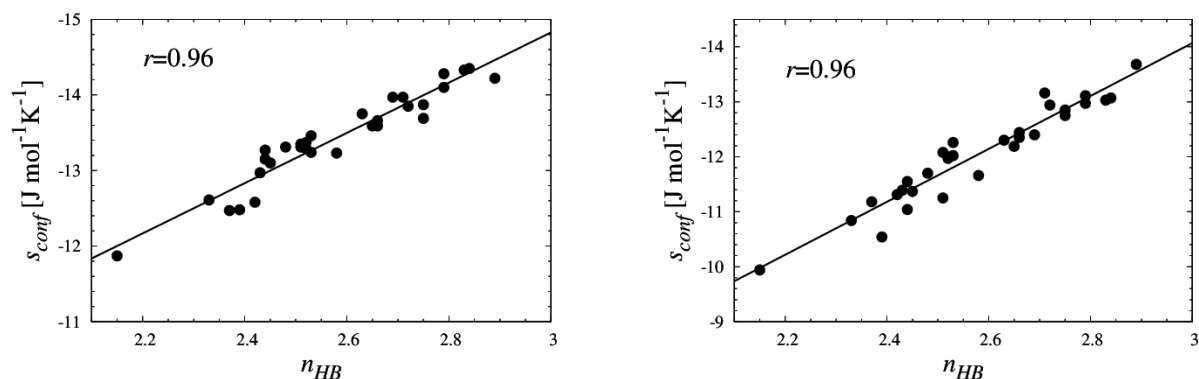

**Figure S3.** Correlation between mean number of the hydrogen bonds per water molecule  $n_{HB}$  and the parameter  $s_{conf}$  for solvation layers of single (0.4 nm, left) and double (0.8 nm, right) thickness. The values of correlation coefficients,  $r$ , are also included.

**Modification of the local ordering parameter idea** – comparison of results of calculations obtained using various  $d_0$  values.

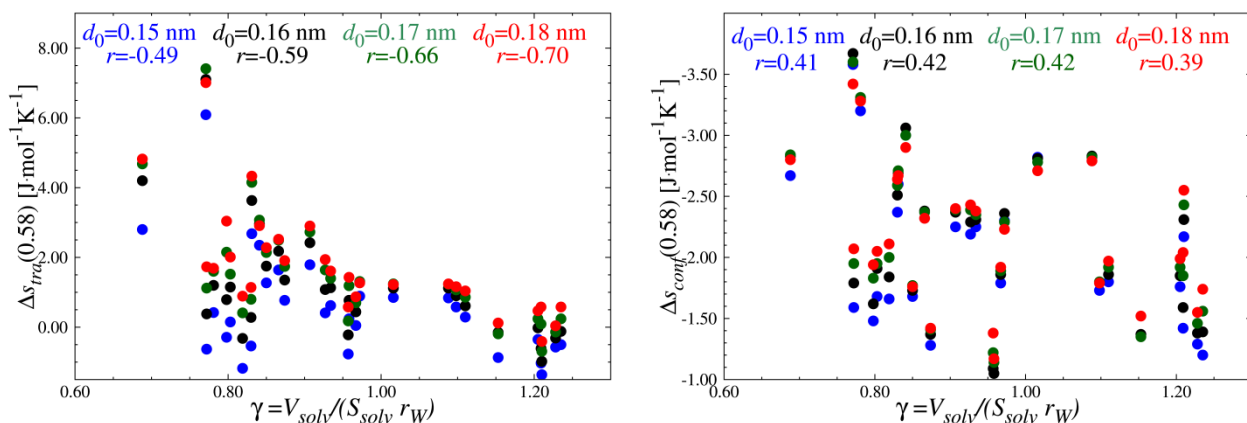

**Figure S4.** Left –  $\Delta s_{conf}$  quantity versus the parameter  $\gamma$ , calculated using various  $d_0$  distances. Right –  $\Delta s_{tra}$  quantity versus the parameter  $\gamma$ , calculated using various  $d_0$  distances. The values of correlation coefficient,  $r$ , are included.

**Correlation of  $s_{tra}(0.58)$  and  $\Delta s_{tra}(0.58)$  with translational diffusion coefficient,  $D_T$ .**

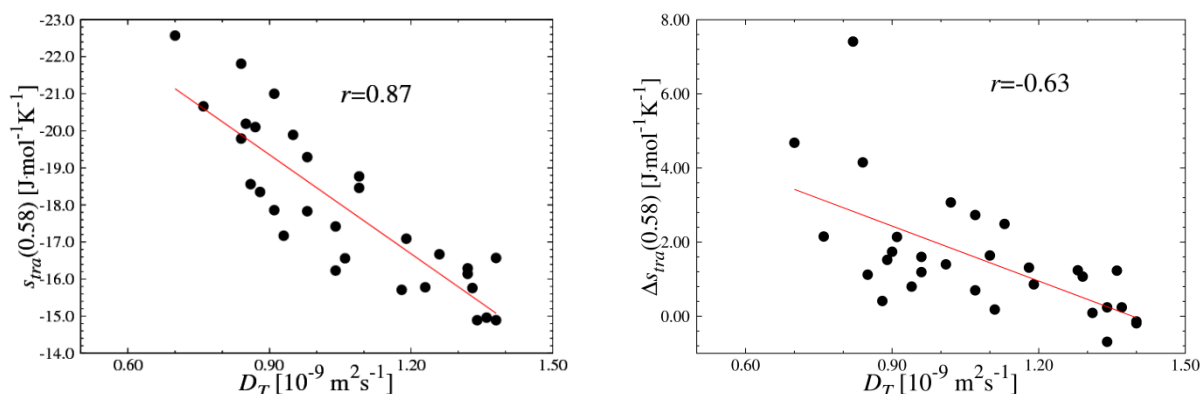

Figure S5. Left –  $s_{tra}$  quantity versus the translational diffusion coefficient,  $D_T$ . Right –  $\Delta s_{tra}$  quantity versus the translational diffusion coefficient,  $D_T$ . The values of correlation coefficient,  $r$ , are included.

**The analysis of protein inner motions** was carried out using a covariance matrix of internal atomic displacements, and the procedure is available in the literature (see reference 35 in the main text). The first step was to determine mean position of each one of all heavy atoms of the protein (that is: besides hydrogen atoms). These mean coordinates have been calculated over the total time of the simulation (20 ns) and over shorter periods of time (1 ns) after removing translational and rotational motion of the molecule as a whole. Next, for each heavy atom, standard deviation from the average position has been calculated. It measures the mobility of atoms in analyzed time scale. Moreover, covariance matrix of atomic displacements has been calculated:

$$C_{ij} = \langle (x_i - \langle x_i \rangle) \cdot (x_j - \langle x_j \rangle) \rangle$$

to be used in PCA analysis of fluctuations in the system.



**Results of analysis of higher PCA modes.**

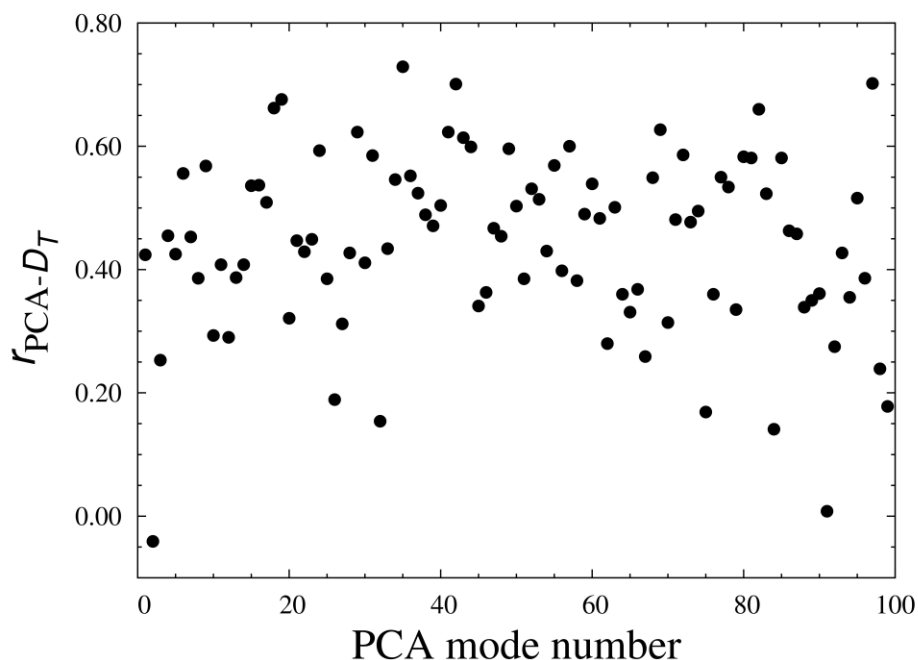

Figure S6. Correlation coefficients,  $r_{\text{PCA-D}_T}$ , between the translational diffusion coefficient of water,  $D_T$ , and the mean mobility of the surface atoms of the kinesin belonging to various patches on the surface, for the first 99 modes obtained from PCA analysis.

**Cited references**

1. *The PyMOL Molecular Graphics System*, Version 1.1, Schrödinger, LLC.
2. Reference 61 in the main text
3. Teixeira, J.; Bellissent-Funel, M.-C.; Chen, S.-H. *J. Phys. Chem. Condens. Matter* 1990, **2**, SA105-SA108.
4. Kumar, R.; Schmidt, J. R.; Skinner, J. L. *J. Chem. Phys.* 2007, **126**, 204107.
5. Chau, P.-L.; Hardwick, A. *J. Mol. Phys.* 1998, **93**, 511.
6. Bernal, J. D.; Finney, J. L. *Discuss. Faraday Soc.* 1967, **43**, 62.
7. Richards, F. M. *J. Mol. Biol.* 1974, **82**, 1.
8. Procacci, P.; Scateni, R. *Int. J. Quant. Chem.* 1992, **42**, 1515.
9. Poupon, A. *Curr. Op. Struct. Biol.* 2004, **14**, 233.
10. D. Chandler, *Introduction to Modern Statistical Mechanics*, Oxford University Press, 1987, Chapter 8.
11. Reference 31 in the main text.



## II. SELECTION OF PATCHES ON THE KINESIN SURFACE.

**Table S1.** Definition of selected regions on the protein surface.

| No. | Name of surface area               | Residue numbers                     |
|-----|------------------------------------|-------------------------------------|
| 1   | $\alpha 0$                         | 20-25                               |
| 2   | $\alpha 1a$                        | 58-60,62-64                         |
| 3   | $\alpha 1b$                        | 66-68,70-72,74-75                   |
| 4   | $\alpha 2b$                        | 108-110,112-114,116-121             |
| 5   | $\alpha 3$                         | 176-178,180-182,184-185,187-190     |
| 6   | $\alpha 3a$                        | 197-204                             |
| 7   | $\alpha 4$                         | 256-257,259-260,262-263,265-270     |
| 8   | $\alpha 5L12$                      | 271-279                             |
| 9   | $\alpha 5L13$                      | 281-282,284-285,287-293             |
| 10  | $\alpha 61$                        | 306-311,313-314                     |
| 11  | $\alpha 62$                        | 315-318,320-321,323-324             |
| 12  | $\alpha 7$                         | 336-349 (for 1MKJ only)             |
| 13  | $\beta 0/\beta 0\beta 9$           | 4-8,326-329 (4-8 for 1BG2)          |
| 14  | $\beta 1a\beta 1b$                 | 32-40                               |
| 15  | $\beta 1c$                         | 41-47                               |
| 16  | $\beta 1\beta 8$                   | 9-10,12,48-50,295-297               |
| 17  | $\beta 5a\beta 5b$                 | 154-157,163-167                     |
| 18  | $\beta 5L8$                        | 158-162                             |
| 19  | $\beta 10$                         | 330-335 (for 1MKJ only)             |
| 20  | $\beta 4\beta 5$                   | 136-143                             |
| 21  | $\beta 4567_1$                     | 123-129,214-216,222-223             |
| 22  | $\beta 4567_2$                     | 131,168-172,209,211,213,224,226,228 |
| 23  | $L\beta 1\alpha 0\beta 2\alpha 1a$ | 16-19,53-57                         |
| 24  | $L\alpha 0\beta 1a$                | 26-31                               |
| 25  | L5                                 | 97-105                              |
| 26  | L8                                 | 145-153                             |
| 27  | L9                                 | 191-196                             |
| 28  | L10                                | 217-221                             |
| 29  | L11_1                              | 233-238,250-255                     |
| 30  | L11_2                              | 239-249                             |

### III. NUMERICAL RESULTS

**Table S2.** Values of parameters describing properties of solvation water next to selected regions on kinesin surface (for conformation 1MKJ and also for pure SPC/E water in the last line). All values are for solvation layer 0.4 nm thick (maximum distance  $R$  from the atoms on kinesin surface), except from values of local ordering parameters, which were calculated for two distances ( $R=0.4$  nm and  $R=0.8$  nm).

In the columns from the left:

$\gamma$  – local corrugation coefficient;

$V$  – mean volume of Voronoi cell;

$D_T$  – translational diffusion coefficient;

$D_R$  – rotational diffusion coefficient;

$\eta$  – mean value of asphericity parameter;

$n_{HB}$  – mean number of hydrogen bonds per water molecule (formed with other water molecules);

$\Delta n_{HB}$  – mean number of hydrogen bonds per water molecule (formed with other water molecules) after extracting direct influence of the shape of the surface.

$s_{tra}$ ,  $s_{conf}$  and  $s_{ort}$  – local ordering parameters;

$\Delta s_{tra}$ ,  $\Delta s_{conf}$  – local ordering parameters after extracting direct influence of the shape of the surface.

| Surface area name                  | $\gamma$   | $V$<br>[nm <sup>3</sup> ] | $D_T$<br>[10 <sup>-9</sup> m <sup>2</sup> s <sup>-1</sup> ] | $D_R$<br>[10 <sup>11</sup> rad <sup>2</sup> s <sup>-1</sup> ] | $\eta$ | $n_{HB}$ | $\Delta n_{HB}$ | $s_{tra}$ | $\Delta s_{tra}$ | $s_{conf}$ | $\Delta s_{conf}$ | $s_{conf}$                             | $s_{ort}$                              |
|------------------------------------|------------|---------------------------|-------------------------------------------------------------|---------------------------------------------------------------|--------|----------|-----------------|-----------|------------------|------------|-------------------|----------------------------------------|----------------------------------------|
|                                    | (R=0.4 nm) |                           |                                                             |                                                               |        |          |                 |           |                  |            |                   | (R=0.8nm)                              |                                        |
|                                    |            |                           |                                                             |                                                               |        |          |                 |           |                  |            |                   | [J mol <sup>-1</sup> K <sup>-1</sup> ] | [J mol <sup>-1</sup> K <sup>-1</sup> ] |
| $\alpha 0$                         | 1.228      | 0.0180                    | 1.40                                                        | 1.71                                                          | 1.680  | 2.84     | 0.38            | -14.89    | -0.14            | -13.07     | -1.46             | -14.35                                 | -50.04                                 |
| $\alpha 1a$                        | 0.850      | 0.0178                    | 0.91                                                        | 1.47                                                          | 1.646  | 2.45     | 0.46            | -17.86    | 2.14             | -11.37     | -1.77             | -13.10                                 | -44.93                                 |
| $\alpha 1b$                        | 0.907      | 0.0179                    | 1.07                                                        | 1.50                                                          | 1.643  | 2.52     | 0.47            | -17.42    | 2.73             | -12.00     | -2.39             | -13.37                                 | -45.08                                 |
| $\alpha 2b$                        | 0.866      | 0.0184                    | 1.13                                                        | 1.74                                                          | 1.658  | 2.58     | 0.55            | -18.77    | 2.49             | -11.66     | -2.37             | -13.23                                 | -46.72                                 |
| $\alpha 3$                         | 0.874      | 0.0179                    | 0.90                                                        | 1.44                                                          | 1.648  | 2.44     | 0.35            | -18.35    | 1.74             | -11.04     | -1.41             | -13.15                                 | -46.93                                 |
| $\alpha 3a$                        | 0.819      | 0.0180                    | 0.88                                                        | 1.44                                                          | 1.647  | 2.44     | 0.35            | -20.10    | 0.41             | -11.55     | -2.00             | -13.27                                 | -45.27                                 |
| $\alpha 4$                         | 0.934      | 0.0181                    | 1.01                                                        | 1.49                                                          | 1.656  | 2.63     | 0.59            | -17.83    | 1.40             | -12.30     | -2.35             | -13.75                                 | -47.33                                 |
| $\alpha 5L12$                      | 1.205      | 0.0183                    | 1.37                                                        | 1.73                                                          | 1.674  | 2.79     | 0.43            | -15.76    | 0.24             | -12.97     | -1.92             | -14.10                                 | -48.91                                 |
| $\alpha 5L13$                      | 0.688      | 0.0179                    | 0.70                                                        | 1.35                                                          | 1.641  | 2.33     | 0.59            | -22.57    | 4.68             | -10.84     | -2.84             | -12.61                                 | -42.82                                 |
| $\alpha 61$                        | 0.803      | 0.0178                    | 0.89                                                        | 1.37                                                          | 1.640  | 2.48     | 0.31            | -18.56    | 1.52             | -11.70     | -1.95             | -13.31                                 | -45.72                                 |
| $\alpha 62$                        | 0.841      | 0.0182                    | 1.02                                                        | 1.55                                                          | 1.655  | 2.52     | 0.69            | -19.29    | 3.07             | -11.97     | -3.00             | -13.29                                 | -45.22                                 |
| $\alpha 7$                         | 1.235      | 0.0180                    | 1.34                                                        | 1.61                                                          | 1.667  | 2.79     | 0.27            | -14.89    | 0.24             | -13.11     | -1.56             | -14.28                                 | -49.80                                 |
| $\beta 0\beta 9$                   | 0.967      | 0.0180                    | 1.07                                                        | 1.58                                                          | 1.662  | 2.66     | 0.53            | -16.56    | 0.70             | -12.44     | -1.89             | -13.59                                 | -47.67                                 |
| $\beta 10$                         | 0.798      | 0.0178                    | 0.76                                                        | 1.35                                                          | 1.642  | 2.39     | 0.48            | -21.81    | 2.15             | -10.54     | -1.83             | -12.48                                 | -42.10                                 |
| $\beta 1a\beta 1b$                 | 1.098      | 0.0181                    | 1.29                                                        | 1.61                                                          | 1.669  | 2.69     | 0.39            | -15.78    | 1.07             | -12.40     | -1.80             | -13.97                                 | -48.53                                 |
| $\beta 1c$                         | 1.088      | 0.0182                    | 1.36                                                        | 1.71                                                          | 1.666  | 2.71     | 0.51            | -16.14    | 1.23             | -13.16     | -2.82             | -13.97                                 | -47.92                                 |
| $\beta 1\beta 8$                   | 0.771      | 0.0179                    | 0.82                                                        | 1.39                                                          | 1.640  | 2.37     | 0.63            | -20.66    | 7.41             | -11.18     | -3.60             | -12.47                                 | -42.29                                 |
| $\beta 5a\beta 5b$                 | 0.927      | 0.0182                    | 1.10                                                        | 1.62                                                          | 1.656  | 2.53     | 0.45            | -18.46    | 1.64             | -12.02     | -2.39             | -13.46                                 | -45.29                                 |
| $\beta 5L8$                        | 1.209      | 0.0182                    | 1.31                                                        | 1.65                                                          | 1.670  | 2.75     | 0.50            | -16.57    | 0.09             | -12.85     | -1.85             | -13.69                                 | -47.02                                 |
| $\beta 4\beta 5$                   | 0.781      | 0.0180                    | 0.96                                                        | 1.52                                                          | 1.644  | 2.53     | 0.68            | -21.00    | 1.60             | -12.26     | -3.31             | -13.24                                 | -44.92                                 |
| $\beta 4567_1$                     | 0.958      | 0.0179                    | 0.96                                                        | 1.41                                                          | 1.651  | 2.51     | 0.33            | -17.17    | 1.19             | -11.25     | -1.14             | -13.35                                 | -46.61                                 |
| $\beta 4567_2$                     | 0.831      | 0.0181                    | 0.84                                                        | 1.40                                                          | 1.643  | 2.42     | 0.69            | -19.79    | 4.15             | -11.31     | -2.71             | -12.58                                 | -44.09                                 |
| $L\beta 1\alpha 0\beta 2\alpha 1a$ | 0.830      | 0.0182                    | 0.94                                                        | 1.48                                                          | 1.645  | 2.51     | 0.47            | -19.89    | 0.80             | -12.08     | -2.59             | -13.31                                 | -46.06                                 |
| $L\alpha 0\beta 1a$                | 1.016      | 0.0182                    | 1.28                                                        | 1.65                                                          | 1.665  | 2.72     | 0.51            | -16.67    | 1.24             | -12.94     | -2.78             | -13.85                                 | -47.18                                 |
| $L5$                               | 1.110      | 0.0180                    | 1.19                                                        | 1.60                                                          | 1.664  | 2.75     | 0.44            | -15.71    | 0.86             | -12.75     | -1.92             | -13.87                                 | -48.69                                 |
| $L8$                               | 0.972      | 0.0180                    | 1.18                                                        | 1.66                                                          | 1.662  | 2.66     | 0.50            | -17.09    | 1.31             | -12.35     | -2.29             | -13.66                                 | -47.40                                 |
| $L9$                               | 1.210      | 0.0182                    | 1.34                                                        | 1.81                                                          | 1.676  | 2.89     | 0.51            | -16.29    | -0.69            | -13.68     | -2.43             | -14.22                                 | -49.57                                 |
| $L10$                              | 0.957      | 0.0179                    | 1.11                                                        | 1.44                                                          | 1.665  | 2.65     | 0.25            | -16.23    | 0.18             | -12.19     | -1.22             | -13.59                                 | -45.98                                 |
| $L11_1$                            | 0.772      | 0.0177                    | 0.85                                                        | 1.35                                                          | 1.637  | 2.43     | 0.42            | -20.19    | 1.12             | -11.39     | -1.95             | -12.97                                 | -43.83                                 |
| $L11_2$                            | 1.153      | 0.0180                    | 1.40                                                        | 1.66                                                          | 1.671  | 2.83     | 0.30            | -14.96    | -0.19            | -13.03     | -1.35             | -14.33                                 | -50.61                                 |
| SPC/E water                        | -          | 0.0187                    | 2.75                                                        | 2.38                                                          | 1.725  | 3.27     | -               | -12.88    | -                | -15.34     | -                 | -15.34                                 | -54.27                                 |

**Table S3.** Standard deviations from mean positions of heavy atoms after removing translational and rotational movement of the whole protein (averaged over the all surface atoms in every selected region separately) for 25 ns run (*std 25*) and 1 ns run (*std 1*). The last column contains results from PCA analysis (*PCA max*).

| Surface area name                  | <i>std 25</i> | <i>std 1</i> | <i>PCA max</i> |
|------------------------------------|---------------|--------------|----------------|
|                                    | [nm]          | [nm]         | [nm]           |
| $\alpha 0$                         | 0.211         | 0.138        | 0.122          |
| $\alpha 1a$                        | 0.144         | 0.104        | 0.038          |
| $\alpha 1b$                        | 0.158         | 0.109        | 0.039          |
| $\alpha 2b$                        | 0.138         | 0.102        | 0.030          |
| $\alpha 3$                         | 0.148         | 0.098        | 0.052          |
| $\alpha 3a$                        | 0.162         | 0.118        | 0.038          |
| $\alpha 4$                         | 0.156         | 0.110        | 0.043          |
| $\alpha 5L12$                      | 0.182         | 0.135        | 0.034          |
| $\alpha 5L13$                      | 0.108         | 0.078        | 0.027          |
| $\alpha 61$                        | 0.160         | 0.095        | 0.086          |
| $\alpha 62$                        | 0.147         | 0.098        | 0.064          |
| $\alpha 7$                         | 0.483         | 0.259        | 0.227          |
| $\beta 0\beta 9$                   | 0.141         | 0.103        | 0.028          |
| $\beta 10$                         | 0.132         | 0.093        | 0.036          |
| $\beta 1a\beta 1b$                 | 0.194         | 0.135        | 0.050          |
| $\beta 1c$                         | 0.185         | 0.129        | 0.066          |
| $\beta 1\beta 8$                   | 0.152         | 0.098        | 0.031          |
| $\beta 5a\beta 5b$                 | 0.195         | 0.115        | 0.090          |
| $\beta 5L8$                        | 0.321         | 0.167        | 0.201          |
| $\beta 4\beta 5$                   | 0.137         | 0.093        | 0.046          |
| $\beta 4567\_1$                    | 0.160         | 0.115        | 0.047          |
| $\beta 4567\_2$                    | 0.125         | 0.090        | 0.026          |
| $L\beta 1\alpha 0\beta 2\alpha 1a$ | 0.123         | 0.093        | 0.032          |
| $L\alpha 0\beta 1a$                | 0.198         | 0.131        | 0.099          |
| $L5$                               | 0.181         | 0.134        | 0.017          |
| $L8$                               | 0.135         | 0.099        | 0.034          |
| $L9$                               | 0.165         | 0.129        | 0.038          |
| $L10$                              | 0.180         | 0.125        | 0.054          |
| $L11\_1$                           | 0.242         | 0.126        | 0.130          |
| $L11\_2$                           | 0.581         | 0.244        | 0.382          |
